# Supplementary material
Source: PubMed Central journal article supplement (PMC6423531)
Supplement: NIHMS1005209-supplement-1.pdf [file NIHMS1005209-supplement-1.pdf]

## **Supplementary material**

---

**Efficacy and Safety of Mechanical versus Manual Compression in Cardiac Arrest-**

**A Bayesian Network Meta-Analysis**

Safi U. Khan, MD, Ahmad N Lone, MD, Swapna Talluri, MD, Muhammad Z. Khan, MD,

Muhammad U. Khan, MD, Edo Kaluski MD

Table 1: Cochrane Bias Risk Assessment Scale

| Studies                                                 | Randomization | Allocation concealment | Blinding (Physician/Patient) | Adjudication of outcomes | Selective outcome reporting | Incomplete data reporting addressed? | Free of other bias? |
|---------------------------------------------------------|---------------|------------------------|------------------------------|--------------------------|-----------------------------|--------------------------------------|---------------------|
| ASPIRE (2006)                                           | Green         | White                  | Red                          | Green                    | Green                       | Green                                | White               |
| Axelsson et al (2006)                                   | Green         | Green                  | Red                          | Green                    | Green                       | Green                                | Green               |
| PARAMEDIC (2015)                                        | Green         | White                  | Red                          | Green                    | Green                       | Green                                | White               |
| Koster et al (2017)                                     | Green         | Green                  | Red                          | Green                    | Green                       | Red                                  | White               |
| Smekal et al (2011)                                     | Green         | Green                  | Red                          | Green                    | White                       | Green                                | White               |
| LINC (2013)                                             | Green         | Green                  | Red                          | Green                    | Green                       | Green                                | White               |
| CIRC (2014)                                             | Green         | Green                  | Red                          | Green                    | Green                       | Green                                | Green               |
| Green (low risk); White (unclear risk); Red (high risk) |               |                        |                              |                          |                             |                                      |                     |

**Rib or Sternal Damage**

**Treatment 1 vs. Treatment 2**

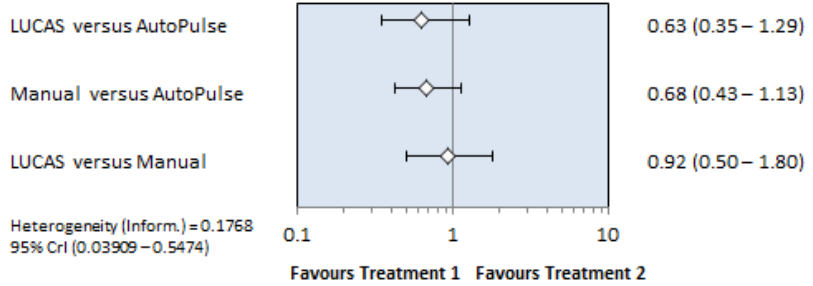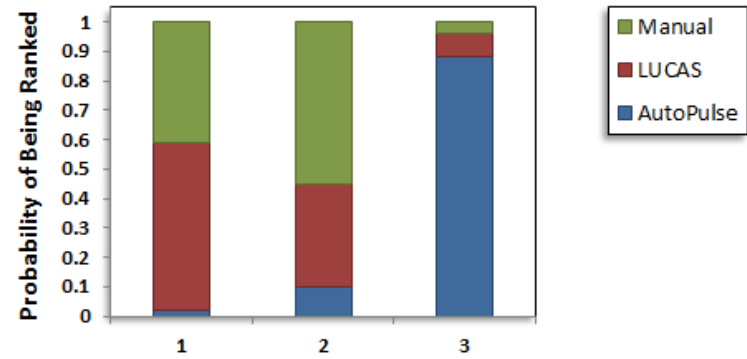

| Treatment | SUCRA |
|-----------|-------|
| LUCAS     | 0.74  |
| Manual    | 0.69  |
| AutoPulse | 0.07  |

Figure 1: Forest plot and Rankogram showing comparisons for rib or sternal fracture

| Section/topic                      | #  | Checklist item                                                                                                                                                                                                                                                                                              | Reported on page # |
|------------------------------------|----|-------------------------------------------------------------------------------------------------------------------------------------------------------------------------------------------------------------------------------------------------------------------------------------------------------------|--------------------|
| <b>TITLE</b>                       |    |                                                                                                                                                                                                                                                                                                             |                    |
| Title                              | 1  | Identify the report as a systematic review, meta-analysis, or both.                                                                                                                                                                                                                                         | 1                  |
| <b>ABSTRACT</b>                    |    |                                                                                                                                                                                                                                                                                                             |                    |
| Structured summary                 | 2  | Provide a structured summary including, as applicable: background; objectives; data sources; study eligibility criteria, participants, and interventions; study appraisal and synthesis methods; results; limitations; conclusions and implications of key findings; systematic review registration number. | 2                  |
| <b>INTRODUCTION</b>                |    |                                                                                                                                                                                                                                                                                                             |                    |
| Rationale                          | 3  | Describe the rationale for the review in the context of what is already known.                                                                                                                                                                                                                              | 3                  |
| Objectives                         | 4  | Provide an explicit statement of questions being addressed with reference to participants, interventions, comparisons, outcomes, and study design (PICOS).                                                                                                                                                  | 3                  |
| <b>METHODS</b>                     |    |                                                                                                                                                                                                                                                                                                             |                    |
| Protocol and registration          | 5  | Indicate if a review protocol exists, if and where it can be accessed (e.g., Web address), and, if available, provide registration information including registration number.                                                                                                                               | Not available      |
| Eligibility criteria               | 6  | Specify study characteristics (e.g., PICOS, length of follow-up) and report characteristics (e.g., years considered, language, publication status) used as criteria for eligibility, giving rationale.                                                                                                      | 4                  |
| Information sources                | 7  | Describe all information sources (e.g., databases with dates of coverage, contact with study authors to identify additional studies) in the search and date last searched.                                                                                                                                  | 4                  |
| Search                             | 8  | Present full electronic search strategy for at least one database, including any limits used, such that it could be repeated.                                                                                                                                                                               | 4                  |
| Study selection                    | 9  | State the process for selecting studies (i.e., screening, eligibility, included in systematic review, and, if applicable, included in the meta-analysis).                                                                                                                                                   | 4                  |
| Data collection process            | 10 | Describe method of data extraction from reports (e.g., piloted forms, independently, in duplicate) and any processes for obtaining and confirming data from investigators.                                                                                                                                  | 4-5                |
| Data items                         | 11 | List and define all variables for which data were sought (e.g., PICOS, funding sources) and any assumptions and simplifications made.                                                                                                                                                                       | 5                  |
| Risk of bias in individual studies | 12 | Describe methods used for assessing risk of bias of individual studies (including specification of whether this was done at the study or outcome level), and how this information is to be used in any data synthesis.                                                                                      | Supplement Table 1 |
| Summary measures                   | 13 | State the principal summary measures (e.g., risk ratio, difference in means).                                                                                                                                                                                                                               | 5-7                |

|                               |    |                                                                                                                                                                                                          |                    |
|-------------------------------|----|----------------------------------------------------------------------------------------------------------------------------------------------------------------------------------------------------------|--------------------|
| Synthesis of results          | 14 | Describe the methods of handling data and combining results of studies, if done, including measures of consistency (e.g., I <sup>2</sup> ) for each meta-analysis.                                       | 5=7                |
| Section/topic                 | #  | Checklist item                                                                                                                                                                                           | Reported on page # |
| Risk of bias across studies   | 15 | Specify any assessment of risk of bias that may affect the cumulative evidence (e.g., publication bias, selective reporting within studies).                                                             | See S Table 1      |
| Additional analyses           | 16 | Describe methods of additional analyses (e.g., sensitivity or subgroup analyses, meta-regression), if done, indicating which were pre-specified.                                                         | Not available      |
| <b>RESULTS</b>                |    |                                                                                                                                                                                                          |                    |
| Study selection               | 17 | Give numbers of studies screened, assessed for eligibility, and included in the review, with reasons for exclusions at each stage, ideally with a flow diagram.                                          | 6                  |
| Study characteristics         | 18 | For each study, present characteristics for which data were extracted (e.g., study size, PICOS, follow-up period) and provide the citations.                                                             | Table 1            |
| Risk of bias within studies   | 19 | Present data on risk of bias of each study and, if available, any outcome level assessment (see item 12).                                                                                                | S Table 1          |
| Results of individual studies | 20 | For all outcomes considered (benefits or harms), present, for each study: (a) simple summary data for each intervention group (b) effect estimates and confidence intervals, ideally with a forest plot. | 6-7                |
| Synthesis of results          | 21 | Present results of each meta-analysis done, including confidence intervals and measures of consistency.                                                                                                  | 6-7                |
| Risk of bias across studies   | 22 | Present results of any assessment of risk of bias across studies (see Item 15).                                                                                                                          | S Table 1          |
| Additional analysis           | 23 | Give results of additional analyses, if done (e.g., sensitivity or subgroup analyses, meta-regression [see Item 16]).                                                                                    | Not available      |
| <b>DISCUSSION</b>             |    |                                                                                                                                                                                                          |                    |
| Summary of evidence           | 24 | Summarize the main findings including the strength of evidence for each main outcome; consider their relevance to key groups (e.g., healthcare providers, users, and policy makers).                     | 7-8                |
| Limitations                   | 25 | Discuss limitations at study and outcome level (e.g., risk of bias), and at review-level (e.g., incomplete retrieval of identified research, reporting bias).                                            | 10                 |
| Conclusions                   | 26 | Provide a general interpretation of the results in the context of other evidence, and implications for future research.                                                                                  | 10                 |
| <b>FUNDING</b>                |    |                                                                                                                                                                                                          |                    |
| Funding                       | 27 | Describe sources of funding for the systematic review and other support (e.g., supply of data); role of funders for the systematic review.                                                               | Not available      |

**Dataset for efficacy estimates (NA= Not Available)**

| Study ID                                         | Studies             | r[,1] | n[,1] | r[,2] | n[,2] | r[,3] | n[,3] | t[,1] | t[,2] | t[,3] | na[] |
|--------------------------------------------------|---------------------|-------|-------|-------|-------|-------|-------|-------|-------|-------|------|
| <b>Survival at 30 days or hospital discharge</b> |                     |       |       |       |       |       |       |       |       |       |      |
| 1                                                | Koster 2016         | 7     | 115   | 17    | 122   | 21    | 137   | 1     | 2     | 3     | 3    |
| 2                                                | Axelsson 2006       | 8     | 159   | 10    | 169   | NA    | 1     | 2     | 3     | NA    | 2    |
| 3                                                | ASPIRE 2006         | 23    | 394   | 37    | 373   | NA    | 1     | 1     | 3     | NA    | 2    |
| 4                                                | Smekal 2011         | 6     | 75    | 7     | 73    | NA    | 1     | 2     | 3     | NA    | 2    |
| 5                                                | LINC 2013           | 117   | 1300  | 118   | 1289  | NA    | 1     | 2     | 3     | NA    | 2    |
| 6                                                | PARAMEDIC 2014      | 104   | 1652  | 193   | 2819  | NA    | 1     | 2     | 3     | NA    | 2    |
| 7                                                | CIRC 2014           | 196   | 2099  | 233   | 2132  | NA    | 1     | 1     | 3     | NA    | 2    |
| <b>Survival at hospital admission</b>            |                     |       |       |       |       |       |       |       |       |       |      |
| 1                                                | Koster 2016         | 43    | 115   | 42    | 122   | 68    | 137   | 1     | 2     | 3     | 3    |
| 2                                                | Axelsson 2006       | 38    | 159   | 37    | 169   | NA    | 1     | 2     | 3     | NA    | 2    |
| 3                                                | ASPIRE 2006         | 102   | 394   | 89    | 373   | NA    | 1     | 1     | 3     | NA    | 2    |
| 4                                                | PARAMEDIC 2014      | 377   | 1652  | 658   | 2819  | NA    | 1     | 2     | 3     | NA    | 2    |
| 5                                                | Smekal 2011         | 18    | 75    | 15    | 73    | NA    | 1     | 2     | 3     | NA    | 2    |
| 6                                                | LINC 2013           | 366   | 1300  | 357   | 1289  | NA    | 1     | 2     | 3     | NA    | 2    |
| 7                                                | CIRC 2014           | 456   | 2099  | 532   | 2132  | NA    | 1     | 1     | 3     | NA    | 2    |
| <b>Return of spontaneous circulation</b>         |                     |       |       |       |       |       |       |       |       |       |      |
| 1                                                | Axelsson et al 2009 | 44    | 64    | 52    | 62    | NA    | 1     | 2     | 3     | NA    | 2    |
| 2                                                | Axelsson et al 2006 | 51    | 159   | 51    | 169   | NA    | 1     | 2     | 3     | NA    | 2    |
| 3                                                | PARAMEDIC 2014      | 522   | 1652  | 885   | 2819  | NA    | 1     | 2     | 3     | NA    | 2    |
| 4                                                | Smekal et al 2011   | 30    | 75    | 23    | 73    | NA    | 1     | 2     | 3     | NA    | 2    |
| 5                                                | LINC 2013           | 460   | 1300  | 446   | 1289  | NA    | 1     | 2     | 3     | NA    | 2    |
| 6                                                | ASPIRE 2006         | 104   | 394   | 92    | 373   | NA    | 1     | 1     | 3     | NA    | 2    |
| <b>Neurological recovery</b>                     |                     |       |       |       |       |       |       |       |       |       |      |
| 1                                                | ASPIRE et al 2006   | 12    | 394   | 28    | 373   | NA    | 1     | 1     | 3     | NA    | 2    |
| 2                                                | PARAMEDIC 2014      | 77    | 1652  | 168   | 2819  | NA    | 1     | 2     | 3     | NA    | 2    |
| 3                                                | LINC al 2013        | 108   | 1300  | 100   | 1289  | NA    | 1     | 2     | 3     | NA    | 2    |

4

CIRC 2014\*

87

2099

112

2132

NA

1

1

3

NA

2

---

## Random effects model code

```
model          # this code for this model was adapted from WinBUGS code from the multi-parameter Evidence Synthesis Research
               Group at the University of Bristol: Website: www.bris.ac.uk/cobm/research/mpes
{
  for(i in
    1:NS)
  {
    # adjustment for multi-arm trials is
    w[i,1] <- 0 # zero for control arm

    delta[i,1] <- 0 # treatment effect is
                  # zero for control arm

    mu[i] ~ dnorm(0,.0001) # vague priors for all
                          # trial baselines
    for (k in
      1:na[i])           # LOOP
                        # THROUGH ARMS
    {
      r[i,k] ~
      dbin(p[i,k],n[i,k] # binomial
          )             # likelihood
      logit(p[i,k]) <- mu[i] + # model for
      delta[i,k]         # linear predictor
      rhat[i,k] <- p[i,k] # expected value of the
      * n[i,k]           # numerators
      #Deviance
      contribution
      dev[i,k] <- 2 * (r[i,k] * (log(r[i,k])-log(rhat[i,k]))) + (n[i,k]-r[i,k]) *
      (log(n[i,k]-r[i,k]) - log(n[i,k]-rhat[i,k])))
    }
    resdev[i] <- # summed residual deviance
    sum(dev[i,1:na[i]]) # contribution for this trial
    for (k in
      2:na[i])       # LOOP
                    # THROUGH ARMS
    {
```



```

    delta[i,k] ~
    dnorm(md[i,k],taud[i,k] # trial-specific LOR
    ]) # distributions
    md[i,k] <- d[t[i,k]] - # mean of LOR distributions (with
    d[t[i,1]] + sw[i,k] # multi-arm trial correction)
    taud[i,k] <- tau # precision of LOR distributions (with
    *2*(k-1)/k # multi-arm trial correction)
    w[i,k] <- (delta[i,k] - # adjustment for multi-
    d[t[i,k]] + d[t[i,1]]) # arm RCTs
    sw[i,k] <- sum(w[i,1:k- # cumulative adjustment for
    1])/(k-1) # multi-arm trials
  }
}
totresdev<- # Total Residual
sum(resdev[]) Deviance

d[1]
<-0
for (k in
2:NT)
{
  d[k] ~ dnorm(0,.0001) # vague
  # priors for basic parameters
}
sd~dunif( # vague prior for random effects
0,2) standard deviation
tau<-
1/pow(sd, # vague prior for random effects
2) standard deviation
# Informative log-normal prior for heterogeneity
variance parameter tau - Turner 2012
# Informative log-normal prior for heterogeneity
variance parameter tau - Turner 2012
# Informative log-normal prior for heterogeneity
variance parameter tau - Turner 2012

```

```
# Treatment 1 baseline, based on average of  
NP trials including it.
```

```
#  
rank  
ing  
for (k in  
1:NT)  
{  
  rk[k]<-NT+1-      # events  
  rank(d[,k])      good  
                  # events  
                  bad  
  
  best[k]<-  
  equals(rk[k],1)  
  for (h in  
  1:NT)  
  {  
    prob[k,h]<-  
    equals(rk[k],h)  
  }  
}  
for (k in  
1:NT)  
{  
  for (h in  
  1:NT)  
  {  
    cumeffectiveness[k,h]<-sum(prob[k,1:h]) # The cumulative ranking probability of  
    treatment i to be among the j best treatments.  
  }  
}  
}
```

```

for(i in
1:NT)
{
  SUCRA[i]<-sum(cumeffectiveness[i,1:(NT-1)])/(NT-1) # The surface
under the cumulative rankings for treatment i.
}
# pairwise
ORs
for (c in
1:(NT-1))
{
  for (k in
(c+1):NT)
  {
    OR[c,k] <-
exp(d[k] - d[c] )
IOR[c,k]<-
d[k]-d[c]
  }
}

#END
} Program

```

**Random effect (informative priors) results for efficacy estimates**

| <b>Survival at 30 days or hospital discharge</b> |             |           |                 |              |               |               |              |               |  |
|--------------------------------------------------|-------------|-----------|-----------------|--------------|---------------|---------------|--------------|---------------|--|
| <b>Node statistics</b>                           |             |           |                 |              |               |               |              |               |  |
| <b>node</b>                                      | <b>mean</b> | <b>SD</b> | <b>MC error</b> | <b>2.50%</b> | <b>median</b> | <b>97.50%</b> | <b>start</b> | <b>sample</b> |  |
| OR[1,2]                                          | 1.362       | 0.2637    | 0.003825        | 0.9579       | 1.326         | 1.99          | 20001        | 60000         |  |
| OR[1,3]                                          | 1.426       | 0.2196    | 0.003128        | 1.09         | 1.396         | 1.94          | 20001        | 60000         |  |
| OR[2,3]                                          | 1.061       | 0.1259    | 0.001607        | 0.8347       | 1.054         | 1.33          | 20001        | 60000         |  |
| SUCRA[1]                                         | 0.0245      | 0.1157    | 0.001144        | 0            | 0             | 0.5           | 20001        | 60000         |  |
| SUCRA[2]                                         | 0.6376      | 0.2676    | 0.003221        | 0            | 0.5           | 1             | 20001        | 60000         |  |
| SUCRA[3]                                         | 0.8379      | 0.2362    | 0.002741        | 0.5          | 1             | 1             | 20001        | 60000         |  |
| best[1]                                          | 0.003467    | 0.05878   | 4.00E-04        | 0            | 0             | 0             | 20001        | 60000         |  |
| best[2]                                          | 0.3187      | 0.466     | 0.005482        | 0            | 0             | 1             | 20001        | 60000         |  |
| best[3]                                          | 0.6778      | 0.4673    | 0.005471        | 0            | 1             | 1             | 20001        | 60000         |  |
| dev[1,1]                                         | 2.091       | 1.698     | 0.01774         | 0.02563      | 1.716         | 6.333         | 20001        | 60000         |  |
| dev[1,2]                                         | 0.6693      | 0.8982    | 0.004902        | 7.54E-04     | 0.325         | 3.208         | 20001        | 60000         |  |
| dev[1,3]                                         | 0.9678      | 1.199     | 0.005923        | 0.001337     | 0.525         | 4.325         | 20001        | 60000         |  |
| dev[2,1]                                         | 0.5346      | 0.7648    | 0.003278        | 4.88E-04     | 0.2418        | 2.699         | 20001        | 60000         |  |
| dev[2,2]                                         | 0.6345      | 0.8952    | 0.003755        | 5.99E-04     | 0.2902        | 3.173         | 20001        | 60000         |  |
| dev[3,1]                                         | 0.8994      | 1.212     | 0.007209        | 9.37E-04     | 0.4351        | 4.351         | 20001        | 60000         |  |
| dev[3,2]                                         | 1.01        | 1.348     | 0.007086        | 0.001086     | 0.4912        | 4.802         | 20001        | 60000         |  |
| dev[4,1]                                         | 0.5394      | 0.7677    | 0.003237        | 5.27E-04     | 0.2438        | 2.714         | 20001        | 60000         |  |
| dev[4,2]                                         | 0.6118      | 0.8602    | 0.003574        | 6.36E-04     | 0.2777        | 3.057         | 20001        | 60000         |  |
| dev[5,1]                                         | 0.8381      | 1.185     | 0.006921        | 7.83E-04     | 0.3791        | 4.239         | 20001        | 60000         |  |
| dev[5,2]                                         | 0.8249      | 1.167     | 0.005503        | 8.05E-04     | 0.3752        | 4.179         | 20001        | 60000         |  |
| dev[6,1]                                         | 0.8067      | 1.154     | 0.007675        | 6.77E-04     | 0.3639        | 4.065         | 20001        | 60000         |  |
| dev[6,2]                                         | 0.8997      | 1.27      | 0.005455        | 9.28E-04     | 0.4104        | 4.476         | 20001        | 60000         |  |
| dev[7,1]                                         | 1.227       | 1.678     | 0.01321         | 0.001232     | 0.5782        | 6.004         | 20001        | 60000         |  |
| dev[7,2]                                         | 1.135       | 1.572     | 0.008456        | 0.001205     | 0.5326        | 5.6           | 20001        | 60000         |  |
| prob[1,1]                                        | 0.003467    | 0.05878   | 4.00E-04        | 0            | 0             | 0             | 20001        | 60000         |  |

|           |         |         |          |         |        |        |       |       |
|-----------|---------|---------|----------|---------|--------|--------|-------|-------|
| prob[1,2] | 0.04207 | 0.2007  | 0.001862 | 0       | 0      | 1      | 20001 | 60000 |
| prob[1,3] | 0.9545  | 0.2085  | 0.002047 | 0       | 1      | 1      | 20001 | 60000 |
| prob[2,1] | 0.3187  | 0.466   | 0.005482 | 0       | 0      | 1      | 20001 | 60000 |
| prob[2,2] | 0.6378  | 0.4806  | 0.005149 | 0       | 1      | 1      | 20001 | 60000 |
| prob[2,3] | 0.04353 | 0.2041  | 0.001989 | 0       | 0      | 1      | 20001 | 60000 |
| prob[3,1] | 0.6778  | 0.4673  | 0.005471 | 0       | 1      | 1      | 20001 | 60000 |
| prob[3,2] | 0.3201  | 0.4665  | 0.005471 | 0       | 0      | 1      | 20001 | 60000 |
| prob[3,3] | 0.002   | 0.04468 | 2.33E-04 | 0       | 0      | 0      | 20001 | 60000 |
| resdev[1] | 3.728   | 1.975   | 0.02194  | 0.7763  | 3.438  | 8.533  | 20001 | 60000 |
| resdev[2] | 1.169   | 1.443   | 0.006161 | 0.02113 | 0.6583 | 5.213  | 20001 | 60000 |
| resdev[3] | 1.91    | 1.702   | 0.01205  | 0.07414 | 1.465  | 6.37   | 20001 | 60000 |
| resdev[4] | 1.151   | 1.443   | 0.006102 | 0.02072 | 0.6285 | 5.245  | 20001 | 60000 |
| resdev[5] | 1.663   | 1.699   | 0.01051  | 0.03996 | 1.138  | 6.25   | 20001 | 60000 |
| resdev[6] | 1.706   | 1.739   | 0.01068  | 0.04244 | 1.17   | 6.373  | 20001 | 60000 |
| resdev[7] | 2.362   | 2.269   | 0.01963  | 0.06649 | 1.687  | 8.428  | 20001 | 60000 |
| rk[1]     | 2.951   | 0.2314  | 0.002288 | 2       | 3      | 3      | 20001 | 60000 |
| rk[2]     | 1.725   | 0.5353  | 0.006443 | 1       | 2      | 3      | 20001 | 60000 |
| rk[3]     | 1.324   | 0.4723  | 0.005481 | 1       | 1      | 2      | 20001 | 60000 |
| sd        | 0.1234  | 0.067   | 9.73E-04 | 0.03566 | 0.1098 | 0.2902 | 20001 | 60000 |
| totresdev | 13.69   | 4.609   | 0.03011  | 6.288   | 13.13  | 24.24  | 20001 | 60000 |

dic.stats()

DIC

Dbar = post.mean of -2logL; Dhat = -2LogL at post.mean of stochastic nodes

|       | Dbar   | Dhat   | pD     | DIC    |
|-------|--------|--------|--------|--------|
| r     | 92.886 | 82.682 | 10.204 | 103.09 |
| total | 92.886 | 82.682 | 10.204 | 103.09 |

gr(OR)

Gelman Rubin statistic

trace(OR)

Dynamic trace

**Survival to hospital admission**

|           |        |         |          |          |        |       |       |       |
|-----------|--------|---------|----------|----------|--------|-------|-------|-------|
| OR[1,2]   | 1.093  | 0.1499  | 0.00168  | 0.8143   | 1.087  | 1.412 | 20001 | 60000 |
| OR[1,3]   | 1.132  | 0.1242  | 0.001241 | 0.8976   | 1.127  | 1.389 | 20001 | 60000 |
| OR[2,3]   | 1.043  | 0.09588 | 9.39E-04 | 0.8719   | 1.037  | 1.251 | 20001 | 60000 |
| SUCRA[1]  | 0.1925 | 0.3323  | 0.003196 | 0        | 0      | 1     | 20001 | 60000 |
| SUCRA[2]  | 0.5349 | 0.3648  | 0.003639 | 0        | 0.5    | 1     | 20001 | 60000 |
| SUCRA[3]  | 0.7726 | 0.2939  | 0.002472 | 0        | 1      | 1     | 20001 | 60000 |
| best[1]   | 0.1024 | 0.3032  | 0.00239  | 0        | 0      | 1     | 20001 | 60000 |
| best[2]   | 0.3035 | 0.4598  | 0.00416  | 0        | 0      | 1     | 20001 | 60000 |
| best[3]   | 0.594  | 0.4911  | 0.004153 | 0        | 1      | 1     | 20001 | 60000 |
| dev[1,1]  | 0.638  | 0.906   | 0.006081 | 6.16E-04 | 0.2917 | 3.236 | 20001 | 60000 |
| dev[1,2]  | 2.162  | 1.979   | 0.01346  | 0.01033  | 1.661  | 7.117 | 20001 | 60000 |
| dev[1,3]  | 2.728  | 2.313   | 0.01307  | 0.02133  | 2.199  | 8.488 | 20001 | 60000 |
| dev[2,1]  | 0.7443 | 1.033   | 0.004796 | 7.60E-04 | 0.347  | 3.668 | 20001 | 60000 |
| dev[2,2]  | 0.7225 | 1.011   | 0.004212 | 7.32E-04 | 0.3305 | 3.607 | 20001 | 60000 |
| dev[3,1]  | 1.263  | 1.603   | 0.01017  | 0.001566 | 0.6572 | 5.725 | 20001 | 60000 |
| dev[3,2]  | 1.213  | 1.565   | 0.008133 | 0.001465 | 0.6231 | 5.639 | 20001 | 60000 |
| dev[4,1]  | 0.8636 | 1.209   | 0.007516 | 8.55E-04 | 0.3981 | 4.285 | 20001 | 60000 |
| dev[4,2]  | 0.9191 | 1.306   | 0.005546 | 8.57E-04 | 0.4173 | 4.637 | 20001 | 60000 |
| dev[5,1]  | 0.7533 | 1.034   | 0.004658 | 7.96E-04 | 0.3533 | 3.705 | 20001 | 60000 |
| dev[5,2]  | 0.677  | 0.9471  | 0.00392  | 6.54E-04 | 0.3129 | 3.389 | 20001 | 60000 |
| dev[6,1]  | 0.9096 | 1.276   | 0.007094 | 8.88E-04 | 0.4137 | 4.575 | 20001 | 60000 |
| dev[6,2]  | 0.9033 | 1.267   | 0.005335 | 9.02E-04 | 0.4133 | 4.493 | 20001 | 60000 |
| dev[7,1]  | 0.9653 | 1.373   | 0.008073 | 9.02E-04 | 0.4399 | 4.858 | 20001 | 60000 |
| dev[7,2]  | 0.9899 | 1.396   | 0.006366 | 9.63E-04 | 0.4454 | 4.996 | 20001 | 60000 |
| prob[1,1] | 0.1024 | 0.3032  | 0.00239  | 0        | 0      | 1     | 20001 | 60000 |
| prob[1,2] | 0.1802 | 0.3843  | 0.002865 | 0        | 0      | 1     | 20001 | 60000 |
| prob[1,3] | 0.7175 | 0.4502  | 0.004338 | 0        | 1      | 1     | 20001 | 60000 |
| prob[2,1] | 0.3035 | 0.4598  | 0.00416  | 0        | 0      | 1     | 20001 | 60000 |
| prob[2,2] | 0.4627 | 0.4986  | 0.003707 | 0        | 0      | 1     | 20001 | 60000 |

|           |         |         |          |         |        |        |       |       |
|-----------|---------|---------|----------|---------|--------|--------|-------|-------|
| prob[2,3] | 0.2338  | 0.4232  | 0.004006 | 0       | 0      | 1      | 20001 | 60000 |
| prob[3,1] | 0.594   | 0.4911  | 0.004153 | 0       | 1      | 1      | 20001 | 60000 |
| prob[3,2] | 0.3572  | 0.4792  | 0.003716 | 0       | 0      | 1      | 20001 | 60000 |
| prob[3,3] | 0.04878 | 0.2154  | 0.001369 | 0       | 0      | 1      | 20001 | 60000 |
| resdev[1] | 5.529   | 2.543   | 0.02016  | 1.144   | 5.376  | 11.18  | 20001 | 60000 |
| resdev[2] | 1.467   | 1.527   | 0.007218 | 0.04552 | 0.9854 | 5.635  | 20001 | 60000 |
| resdev[3] | 2.475   | 2.043   | 0.01558  | 0.09772 | 1.987  | 7.655  | 20001 | 60000 |
| resdev[4] | 1.783   | 1.787   | 0.01014  | 0.04487 | 1.233  | 6.545  | 20001 | 60000 |
| resdev[5] | 1.43    | 1.485   | 0.006759 | 0.07176 | 0.9553 | 5.566  | 20001 | 60000 |
| resdev[6] | 1.813   | 1.802   | 0.01008  | 0.04581 | 1.257  | 6.654  | 20001 | 60000 |
| resdev[7] | 1.955   | 1.966   | 0.01231  | 0.04907 | 1.351  | 7.224  | 20001 | 60000 |
| rk[1]     | 2.615   | 0.6645  | 0.006391 | 1       | 3      | 3      | 20001 | 60000 |
| rk[2]     | 1.93    | 0.7297  | 0.007278 | 1       | 2      | 3      | 20001 | 60000 |
| rk[3]     | 1.455   | 0.5878  | 0.004944 | 1       | 1      | 3      | 20001 | 60000 |
| sd        | 0.1158  | 0.06293 | 8.60E-04 | 0.03365 | 0.1029 | 0.2737 | 20001 | 60000 |
| totresdev | 16.45   | 4.911   | 0.02842  | 8.194   | 15.98  | 27.43  | 20001 | 60000 |

dic.stats()

DIC

Dbar = post.mean of -2logL; Dhat = -2LogL at post.mean of stochastic nodes

|       | Dbar    | Dhat   | pD     | DIC     |
|-------|---------|--------|--------|---------|
| r     | 109.465 | 98.442 | 11.023 | 120.489 |
| total | 109.465 | 98.442 | 11.023 | 120.489 |

gr(OR)

Gelman Rubin statistic

trace(OR)

Dynamic trace

**Return of spontaneous circulation**

|         |        |         |          |        |        |       |       |       |
|---------|--------|---------|----------|--------|--------|-------|-------|-------|
| OR[1,2] | 0.9497 | 0.2203  | 0.002337 | 0.5924 | 0.9247 | 1.452 | 20001 | 60000 |
| OR[1,3] | 0.9336 | 0.1985  | 0.002112 | 0.6091 | 0.9123 | 1.38  | 20001 | 60000 |
| OR[2,3] | 0.9909 | 0.08945 | 8.54E-04 | 0.8287 | 0.9855 | 1.186 | 20001 | 60000 |

|           |        |        |          |          |        |       |       |       |
|-----------|--------|--------|----------|----------|--------|-------|-------|-------|
| SUCRA[1]  | 0.664  | 0.4403 | 0.004426 | 0        | 1      | 1     | 20001 | 60000 |
| SUCRA[2]  | 0.464  | 0.3831 | 0.003628 | 0        | 0.5    | 1     | 20001 | 60000 |
| SUCRA[3]  | 0.372  | 0.3388 | 0.003171 | 0        | 0.5    | 1     | 20001 | 60000 |
| best[1]   | 0.6055 | 0.4887 | 0.004773 | 0        | 1      | 1     | 20001 | 60000 |
| best[2]   | 0.2601 | 0.4387 | 0.003984 | 0        | 0      | 1     | 20001 | 60000 |
| best[3]   | 0.1344 | 0.3411 | 0.002737 | 0        | 0      | 1     | 20001 | 60000 |
| dev[1,1]  | 2.3    | 2.19   | 0.01028  | 0.009761 | 1.714  | 7.984 | 20001 | 60000 |
| dev[1,2]  | 2.415  | 2.105  | 0.009637 | 0.02124  | 1.899  | 7.689 | 20001 | 60000 |
| dev[2,1]  | 0.6647 | 0.9398 | 0.004441 | 6.53E-04 | 0.3062 | 3.331 | 20001 | 60000 |
| dev[2,2]  | 0.6651 | 0.9493 | 0.004085 | 6.61E-04 | 0.3012 | 3.327 | 20001 | 60000 |
| dev[3,1]  | 0.8919 | 1.252  | 0.007874 | 9.22E-04 | 0.4062 | 4.494 | 20001 | 60000 |
| dev[3,2]  | 0.9338 | 1.321  | 0.005439 | 9.56E-04 | 0.4232 | 4.697 | 20001 | 60000 |
| dev[4,1]  | 1.042  | 1.317  | 0.00616  | 0.001122 | 0.5482 | 4.729 | 20001 | 60000 |
| dev[4,2]  | 0.9968 | 1.274  | 0.005286 | 0.001167 | 0.5182 | 4.525 | 20001 | 60000 |
| dev[5,1]  | 0.8655 | 1.225  | 0.006105 | 8.29E-04 | 0.3936 | 4.359 | 20001 | 60000 |
| dev[5,2]  | 0.8681 | 1.237  | 0.005774 | 8.01E-04 | 0.3893 | 4.389 | 20001 | 60000 |
| dev[6,1]  | 0.9865 | 1.404  | 0.00854  | 0.001019 | 0.448  | 4.989 | 20001 | 60000 |
| dev[6,2]  | 0.9877 | 1.398  | 0.007413 | 9.50E-04 | 0.4481 | 4.958 | 20001 | 60000 |
| prob[1,1] | 0.6055 | 0.4887 | 0.004773 | 0        | 1      | 1     | 20001 | 60000 |
| prob[1,2] | 0.1169 | 0.3213 | 0.001809 | 0        | 0      | 1     | 20001 | 60000 |
| prob[1,3] | 0.2776 | 0.4478 | 0.004248 | 0        | 0      | 1     | 20001 | 60000 |
| prob[2,1] | 0.2601 | 0.4387 | 0.003984 | 0        | 0      | 1     | 20001 | 60000 |
| prob[2,2] | 0.4078 | 0.4914 | 0.003631 | 0        | 0      | 1     | 20001 | 60000 |
| prob[2,3] | 0.3321 | 0.471  | 0.004129 | 0        | 0      | 1     | 20001 | 60000 |
| prob[3,1] | 0.1344 | 0.3411 | 0.002737 | 0        | 0      | 1     | 20001 | 60000 |
| prob[3,2] | 0.4753 | 0.4994 | 0.003541 | 0        | 0      | 1     | 20001 | 60000 |
| prob[3,3] | 0.3903 | 0.4878 | 0.004346 | 0        | 0      | 1     | 20001 | 60000 |
| resdev[1] | 4.715  | 1.915  | 0.01282  | 1.489    | 4.498  | 9.339 | 20001 | 60000 |
| resdev[2] | 1.33   | 1.511  | 0.007175 | 0.03008  | 0.8216 | 5.529 | 20001 | 60000 |
| resdev[3] | 1.826  | 1.829  | 0.01092  | 0.04581  | 1.264  | 6.78  | 20001 | 60000 |



|           |        |        |          |         |        |        |       |       |
|-----------|--------|--------|----------|---------|--------|--------|-------|-------|
| resdev[4] | 2.039  | 1.6    | 0.008171 | 0.2126  | 1.622  | 6.317  | 20001 | 60000 |
| resdev[5] | 1.734  | 1.769  | 0.009669 | 0.04105 | 1.18   | 6.533  | 20001 | 60000 |
| resdev[6] | 1.974  | 1.988  | 0.01394  | 0.05087 | 1.357  | 7.28   | 20001 | 60000 |
| rk[1]     | 1.672  | 0.8807 | 0.008853 | 1       | 1      | 3      | 20001 | 60000 |
| rk[2]     | 2.072  | 0.7661 | 0.007256 | 1       | 2      | 3      | 20001 | 60000 |
| rk[3]     | 2.256  | 0.6777 | 0.006341 | 1       | 2      | 3      | 20001 | 60000 |
| sd        | 0.1089 | 0.0655 | 8.72E-04 | 0.03127 | 0.0932 | 0.2777 | 20001 | 60000 |
| totresdev | 13.62  | 4.286  | 0.02474  | 6.975   | 13.02  | 23.55  | 20001 | 60000 |

dic.stats()

DIC

Dbar = post.mean of -2logL; Dhat = -2LogL at post.mean of stochastic nodes

|       | Dbar   | Dhat   | pD    | DIC    |
|-------|--------|--------|-------|--------|
| r     | 85.473 | 76.381 | 9.092 | 94.565 |
| total | 85.473 | 76.381 | 9.092 | 94.565 |

gr(OR)

Gelman Rubin statistic

trace(OR)

Dynamic trace

**Neurological recovery**

|          |          |         |          |          |        |       |       |       |
|----------|----------|---------|----------|----------|--------|-------|-------|-------|
| OR[1,2]  | 1.444    | 0.4383  | 0.0056   | 0.8663   | 1.377  | 2.446 | 20001 | 60000 |
| OR[1,3]  | 1.566    | 0.3496  | 0.004952 | 1.059    | 1.514  | 2.391 | 20001 | 60000 |
| OR[2,3]  | 1.115    | 0.1871  | 0.001452 | 0.7941   | 1.102  | 1.515 | 20001 | 60000 |
| SUCRA[1] | 0.04829  | 0.1637  | 0.00159  | 0        | 0      | 0.5   | 20001 | 60000 |
| SUCRA[2] | 0.584    | 0.2762  | 0.002325 | 0        | 0.5    | 1     | 20001 | 60000 |
| SUCRA[3] | 0.8677   | 0.225   | 0.001693 | 0.5      | 1      | 1     | 20001 | 60000 |
| best[1]  | 0.009983 | 0.09942 | 7.65E-04 | 0        | 0      | 0     | 20001 | 60000 |
| best[2]  | 0.2508   | 0.4335  | 0.003254 | 0        | 0      | 1     | 20001 | 60000 |
| best[3]  | 0.7392   | 0.4391  | 0.003295 | 0        | 1      | 1     | 20001 | 60000 |
| dev[1,1] | 1.563    | 1.756   | 0.01534  | 0.00289  | 0.9764 | 6.295 | 20001 | 60000 |
| dev[1,2] | 1.518    | 1.865   | 0.01111  | 0.002087 | 0.8363 | 6.674 | 20001 | 60000 |

|           |          |         |          |          |        |        |       |       |
|-----------|----------|---------|----------|----------|--------|--------|-------|-------|
| dev[2,1]  | 1.074    | 1.479   | 0.0112   | 0.001089 | 0.503  | 5.272  | 20001 | 60000 |
| dev[2,2]  | 1.081    | 1.504   | 0.00699  | 0.001096 | 0.5046 | 5.331  | 20001 | 60000 |
| dev[3,1]  | 1.129    | 1.546   | 0.009466 | 0.001144 | 0.5286 | 5.51   | 20001 | 60000 |
| dev[3,2]  | 1.064    | 1.479   | 0.006928 | 0.001074 | 0.4975 | 5.236  | 20001 | 60000 |
| dev[4,1]  | 1.175    | 1.628   | 0.01441  | 0.001099 | 0.5431 | 5.789  | 20001 | 60000 |
| dev[4,2]  | 1.064    | 1.499   | 0.008435 | 0.001035 | 0.4827 | 5.354  | 20001 | 60000 |
| prob[1,1] | 0.009983 | 0.09942 | 7.65E-04 | 0        | 0      | 0      | 20001 | 60000 |
| prob[1,2] | 0.07662  | 0.266   | 0.00231  | 0        | 0      | 1      | 20001 | 60000 |
| prob[1,3] | 0.9134   | 0.2812  | 0.002672 | 0        | 1      | 1      | 20001 | 60000 |
| prob[2,1] | 0.2508   | 0.4335  | 0.003254 | 0        | 0      | 1      | 20001 | 60000 |
| prob[2,2] | 0.6665   | 0.4715  | 0.003529 | 0        | 1      | 1      | 20001 | 60000 |
| prob[2,3] | 0.08268  | 0.2754  | 0.00254  | 0        | 0      | 1      | 20001 | 60000 |
| prob[3,1] | 0.7392   | 0.4391  | 0.003295 | 0        | 1      | 1      | 20001 | 60000 |
| prob[3,2] | 0.2569   | 0.4369  | 0.003241 | 0        | 0      | 1      | 20001 | 60000 |
| prob[3,3] | 0.003917 | 0.06246 | 3.53E-04 | 0        | 0      | 0      | 20001 | 60000 |
| resdev[1] | 3.081    | 2.203   | 0.02352  | 0.1744   | 2.683  | 8.467  | 20001 | 60000 |
| resdev[2] | 2.155    | 2.078   | 0.01534  | 0.05597  | 1.538  | 7.675  | 20001 | 60000 |
| resdev[3] | 2.193    | 2.086   | 0.01408  | 0.06095  | 1.582  | 7.703  | 20001 | 60000 |
| resdev[4] | 2.238    | 2.198   | 0.02068  | 0.0538   | 1.583  | 8.168  | 20001 | 60000 |
| rk[1]     | 2.903    | 0.3274  | 0.003181 | 2        | 3      | 3      | 20001 | 60000 |
| rk[2]     | 1.832    | 0.5525  | 0.00465  | 1        | 2      | 3      | 20001 | 60000 |
| rk[3]     | 1.265    | 0.45    | 0.003386 | 1        | 1      | 2      | 20001 | 60000 |
| sd        | 0.1588   | 0.0947  | 0.001265 | 0.04076  | 0.138  | 0.3982 | 20001 | 60000 |
| totresdev | 9.668    | 4.093   | 0.03035  | 3.131    | 9.177  | 19.16  | 20001 | 60000 |

dic.stats()

DIC

Dbar = post.mean of -2logL; Dhat = -2LogL at post.mean of stochastic nodes

|       | Dbar   | Dhat   | pD    | DIC    |
|-------|--------|--------|-------|--------|
| r     | 57.676 | 50.661 | 7.015 | 64.691 |
| total | 57.676 | 50.661 | 7.015 | 64.691 |

gr(OR)

---

Gelman Rubin statistic

---

trace(OR)

---

Dynamic trace

---

### **Search algorithm (PubMed/MEDLINE)**

("heart arrest"[MeSH Terms] OR ("heart"[All Fields] AND "arrest"[All Fields]) OR "heart arrest"[All Fields] OR ("cardiac"[All Fields] AND "arrest"[All Fields]) OR "cardiac arrest"[All Fields]) AND ("heart arrest"[MeSH Terms] OR ("heart"[All Fields] AND "arrest"[All Fields]) OR "heart arrest"[All Fields])) OR "cardiopulmonary resuscitation"[All Fields] OR ("cardiopulmonary resuscitation"[MeSH Terms] OR ("cardiopulmonary"[All Fields] AND "resuscitation"[All Fields]) OR "cardiopulmonary resuscitation"[All Fields] OR "CPR"[All Fields]) AND mechanical[All Fields] OR (load[All Fields] AND distributing[All Fields] AND ("Band"[Journal] OR "band"[All Fields])) OR (piston[All Fields] AND driven[All Fields]) OR lucas[All Fields] OR autopulse.[All Fields] AND (Clinical Trial[ptyp] AND "loattrfull text"[sb] AND "humans"[MeSH Terms]).
